# Supplementary material for: The Transformation of Coastal Governance, from Human Ecology to Local State, in the Jimei Peninsula, Xiamen, China
Source: MDPI journal article supplement (doi:10.3390/w15142659), 2023-07-22
Supplement: s1 [file s1]

**Table S1:** Overview of Interviewees and Summary

| Case | Code | Gender | Age                                    | Background of interviewee and Interview Summary                                                                                                                                                                                                                                                                                                                                                                                                                                                                                                                                                                                                                                           | Time of Interviewed |
|------|------|--------|----------------------------------------|-------------------------------------------------------------------------------------------------------------------------------------------------------------------------------------------------------------------------------------------------------------------------------------------------------------------------------------------------------------------------------------------------------------------------------------------------------------------------------------------------------------------------------------------------------------------------------------------------------------------------------------------------------------------------------------------|---------------------|
| 1    | M-a  | Male   | About 70 years old (Mr. Chen)          | Reside in Jimei Dashe, belonging to the Chen clan of Dashe. Has been living near the Jiageng Memorial Hall since birth. Engaged in aquaculture in the coastal waters near Jimei Bridge. Prior to the implementation of the coastal Exclusion Policy in 2002, cultivated clams as a sideline. Received compensation when Jimei implemented the Coastal Exclusion Policy in 2006. The interviewee has experienced the entire process of coastal governance in Xiamen.                                                                                                                                                                                                                       | 2023-04-15          |
| 2    | M-b  | Male   | About 20 years old (Mr. Chen, student) | Reside in Jimei Dashe, belonging to the Chen clan of Dashe. Born in 2000 and has been living in Jimei Dashe. During the period of the Coastal Exclusion Policy, the interviewee was still young and lived near the Jiageng Memorial Hall. Used to play on the beaches near Ao Garden when young, thus having a clear understanding of the changes in the coastal environment.                                                                                                                                                                                                                                                                                                             | 2023-04-15          |
| 3    | M-c  | Male   | About 30 years old (Mr. Chen, boss)    | Reside in Xiang'an District, belonging to the local residents and fishermen. Owns a fishing boat and relied on aquaculture and fishing for a living in the village over twenty years ago. Joined the father in going out to sea at a young age and personally experienced the process of coastal governance in Xiamen. Has deep insights into the Coastal Exclusion Policy and other policies.                                                                                                                                                                                                                                                                                            | 2023-04-16          |
| 4    | F-a  | Female | About 40 years old (Ms. Chen)          | Reside in Jimei Dashe, belonging to the Dashe residents. Has been operating a vegetable stall in the area for many years and has a clear understanding of the changes in local seafood harvest.                                                                                                                                                                                                                                                                                                                                                                                                                                                                                           | 2023-04-20          |
| 5    | M-d  | Male   | About 50 years old (Mr. Chen)          | Reside in Jimei Dashe, belonging to the Dashe residents. Has been operating a vegetable stall in the area for many years and is responsible for sourcing vegetables and seafood. Has a good understanding of the changes in Jimei Dashe's aquaculture households and the fishing and aquaculture situation in the surrounding waters.                                                                                                                                                                                                                                                                                                                                                     | 2023-04-20          |
| 6    | F-b  | Female | About 60 years old (Ms. Chen)          | Reside in Jimei Dashe, belonging to the Dashe residents. Buys oysters from seafood vendors for further processing and selling to oyster pancake businesses. Engaged in this activity on a daily basis and has a clear understanding of the changes in the source of seafood during the coastal governance period in Xiamen.                                                                                                                                                                                                                                                                                                                                                               | 2023-04-20          |
| 7    | F-c  | Female | About 50 years old (Ms. Lin)           | Reside near Beihai Bay and often take children to dig clams under Jimei Bridge. Has a profound experience of the entire process of coastal governance in Xiamen. Believes that the seawater has been purified, the amount of garbage has reduced, and the scenery has become more beautiful, but the area of intertidal flats has decreased.                                                                                                                                                                                                                                                                                                                                              | 2023-05-29          |
| 8    | M-e  | Male   | About 50 years old (Mr. Liu)           | Reside near Xinglin Bay, originally from Henan province. Discharged from the military and relocated to Xiamen in the 1980s. Has a deep understanding of the ecological changes in Xinglin Bay, which used to be an aquaculture farm with a poor environment. Considers Xiamen's coastal governance to be quite effective, with improvements in ecological and residential environments. Personally, witnessed the landscape construction of the Xinglin Bay coastline.                                                                                                                                                                                                                    | 2023-04-09          |
| 9    | M-f  | Male   | About 30 years old (Mr. Chen)          | Resides in Jimei Dashe, a local resident responsible for enrolling students at Chen's Elementary School. Has frequent contact with local residents and has knowledge about various aspects. Has experienced the transformation of the lifestyle of Dashe residents during the coastal governance in Xiamen over the past twenty years. Previously, family members were engaged in fishing, thus having a good understanding of fishing and aquaculture. Has a detailed understanding of the changes in the coastline and believes that the beaches are now artificially filled, and local people are no longer engaged in marine occupations. Conducted using the focus interview method. | 2023-05-30          |
| 10   | M-g  | Male   | About 50 years old (Mr. Chen)          | Resides in Jimei Dashe, a local resident who personally experienced the transformation of the local residents' way of life. Used to dig clams with friends on the beach as a child. Familiar with the changes in the coastline and has family members who used to be fishermen or engaged in aquaculture but have now switched to other occupations. He had told us that they could not talk                                                                                                                                                                                                                                                                                              | 2023-05-29          |

|    |     |        |                                  |                                                                                                                                                                                                                                                                                                                                                                                                                                                                      |            |
|----|-----|--------|----------------------------------|----------------------------------------------------------------------------------------------------------------------------------------------------------------------------------------------------------------------------------------------------------------------------------------------------------------------------------------------------------------------------------------------------------------------------------------------------------------------|------------|
|    |     |        |                                  | about the Coastal Exclusion Policy and needed to ask the neighborhood committee.                                                                                                                                                                                                                                                                                                                                                                                     |            |
| 11 | F-d | Female | About 40 years old<br>(Ms. Chen) | Resides in Jimei Dashe, a local resident and community staff member. Has a good understanding of the lifestyle of Dashe residents and is knowledgeable about the work arrangements for fishermen after coming ashore. Believes that local residents have security after coming ashore, and the scenery and ecological environment in Dashe have improved. Conducted using the focus interview method.                                                                | 2023-05-30 |
| 12 | F-e | Female | About 30 years old<br>(Ms. Lin)  | Resides in Jimei Dashe, a non-local resident who joined the community and is responsible for the labor security of Xunjiang community residents. Previously, helped unemployed fishermen find work before 2018, but in recent years, the employment situation of fishermen coming ashore has become more stable. Conducted using the focus interview method.                                                                                                         | 2023-05-30 |
| 13 | F-f | Female | About 40 years old<br>(Ms. Chen) | Resides in Jimei Dashe, a non-local resident who joined the community and is responsible for resolving disputes among Xunjiang community residents. Has knowledge of the work arrangements for fishermen in Dashe and is familiar with the current working methods in the area. Conducted using the focus interview method.                                                                                                                                          | 2023-05-30 |
| 14 | F-g | Female | About 50 years old<br>(Ms. Chen) | Resides in Jimei District, a long-standing community employee with a clear understanding of the development in Dashe. Experienced the entire process of implementing coastal governance policies in Xiamen and believes that the policies have been effective in improving water quality, managing fishermen, and protecting the ecological environment. However, there have been changes in the lifestyle of fishermen. Conducted using the focus interview method. | 2023-05-30 |
| 15 | M-h | Male   | About 50 years old<br>(Mr. Lin)  | Resides in Xiamen Siming District, moved to Jimei Normal School with parents at the age of eight and attended Jimei Elementary School. Grew up and worked in Jimei District. Often went to the beach with friends when young and has a deep understanding of coastal development. Believes that the coastal zone before 1987 was better than it is now and the Coastal Exclusion Policy may be to combat maritime smuggling.                                         | 2023-05-31 |
| 16 | M-i | Male   | About 30 years old<br>(Mr. Chen) | Resides in Jimei Dashe, a resident of the area and a sailing enthusiast. Grew up by the seaside and has firsthand experience of the changes in the coastline.                                                                                                                                                                                                                                                                                                        | 2023-05-31 |
| 17 | M-j | Male   | About 60 years old<br>(Mr. Chen) | Resides in Jimei Dashe, a local resident. Engages in digging clams on a daily basis to supplement household income. Buys clams from friends, processes them, and sells them to nearby businesses. Has a good understanding of the development trends of seafood in Xiamen and has personally experienced the changes in the coastline over the past twenty years of coastal governance.                                                                              | 2023-06-04 |
| 18 | F-h | Female | About 60 years old<br>(Ms. Chen) | Resides in Jimei Dashe, a local resident and member of the Chen clan association. Familiar with the lifestyle changes of Dashe residents and has a deep experience of the entire process of coastal governance.                                                                                                                                                                                                                                                      | 2023-06-04 |
| 19 | M-k | Male   | About 70 years old<br>(Mr. Chen) | Resides in Jimei Dashe, a local resident. Member of the Chen clan association, knowledgeable about the lifestyle of Dashe residents, familiar with the local living culture, and aware of the changes in the fishing community's culture.                                                                                                                                                                                                                            | 2023-06-04 |
| 20 | F-i | Female | About 60 years old<br>(Ms. Chen) | Resides in Jimei Dashe, a local resident. Engages in the sale of fish, familiar with the fishing trends in Jimei, including fishing methods and locations, and has witnessed the changes in fishing practices over the past twenty to thirty years of coastal governance.                                                                                                                                                                                            | 2023-06-04 |
| 21 | M-l | Male   | About 70 years old<br>(Mr. Chen) | Resides in Jimei Dashe, a local resident and retired high school teacher. Concerned about the shift in policy development, has a keen understanding of the changes in the coastline and intertidal flats, and holds a macroscopic view of the impact of policies on the lifestyle of local residents.                                                                                                                                                                | 2023-06-04 |

\* The age of the interviewees is based on the year of the interview. As much as possible, inquire about the complete personal information of the interviewees. In accordance with research ethics, the interviewees are represented by codes. The code "F" represents female, "M" represents male, "F-A" represents female A, and "M-B" represents male B.

**Table S2 : Xiamen's marine policies over the years and their levels and scales**

| No. | Law/Regulations                                                                                                                | Year | Level         | Scale         |
|-----|--------------------------------------------------------------------------------------------------------------------------------|------|---------------|---------------|
| 1   | To levy Java, temporarily ban merchants and navigators from Zhejiang, Guangdong, and Fujian. (Yuan Dynasty)                    | 1292 | National      | National      |
| 2   | Forbid merchants to go to sea. (Yuan Dynasty)                                                                                  | 1303 | National      | National      |
| 3   | Banning ships from going to sea. (Yuan Dynasty)                                                                                | 1311 | National      | National      |
| 4   | Prohibition of coastal residents from contacting overseas countries privately. (Ming Dynasty)                                  | 1381 | National      | National      |
| 5   | Sea ban imposed, coastal residents head inland. (Ming Dynasty)                                                                 | 1387 | National      | National      |
| 6   | Lift the sea ban, adjust the overseas trade policy, and allow the private sector to sell far and wide. (Ming Dynasty)          | 1567 | National      | National      |
| 7   | Move to Sea Order. (Ching Dynasty)                                                                                             | 1661 | National      | National      |
| 8   | Strictly ban access to the sea. (Ching Dynasty)                                                                                | 1662 | National      | National      |
| 9   | The people migrated to the mainland, and the sea was strictly prohibited, and their traffic was cut off. (Ching Dynasty)       | 1678 | National      | National      |
| 10  | lifting the ban on maritime trade. (Ching Dynasty)                                                                             | 1683 | National      | National      |
| 11  | Nanyang Maritime Ban. (Ching Dynasty)                                                                                          | 1717 | National      | National      |
| 12  | Xiamen fishermen's union was established.                                                                                      | 1956 | Municipal     | local         |
| 13  | Convention on the Territorial Sea and the Contiguous Zone.                                                                     | 1958 | International | International |
| 14  | Geneva Convention on the High Seas.                                                                                            | 1962 | International | International |
| 15  | Convention on the continental shelf.                                                                                           | 1964 | International | International |
| 16  | Convention on Fishing and Conservation of the Living Resources of the High Seas.                                               | 1966 | International | International |
| 17  | Convention for the Prevention of Marine Pollution by Dumping of Wastes and Other Substances, 1972 (London Convention).         | 1972 | International | International |
| 18  | Marine Environment Protection Law.                                                                                             | 1982 | National      | National      |
| 19  | Maritime Traffic Safety Law.                                                                                                   | 1983 | National      | National      |
| 20  | Regulations on Administration of Environmental Protection in the Exploration and Development of Offshore Petroleum.            | 1983 | National      | National      |
| 21  | The fishermen commune was reorganized as Xiamen second Marine fishery Company.                                                 | 1984 | Municipal     | local         |
| 22  | Regulations on Control of Dumping of Wastes in the Ocean                                                                       | 1985 | National      | National      |
| 23  | Fisheries Law.                                                                                                                 | 1986 | National      | National      |
| 24  | Mineral Resources Law.                                                                                                         | 1986 | National      | National      |
| 25  | Law on Land Resources Governance.                                                                                              | 1986 | National      | National      |
| 26  | Regulations Concerning Prevention of Environmental Pollution by Ship-breaking.                                                 | 1988 | National      | National      |
| 27  | Environmental Protection Law.                                                                                                  | 1989 | National      | National      |
| 28  | Law on the Protection of Wildlife.                                                                                             | 1989 | National      | National      |
| 29  | Regulations Concerning Prevention and Control of Pollution Damages to the Marine Environment by Coastal Construction Projects. | 1990 | National      | National      |
| 30  | Regulations Concerning Prevention of Pollution Damage to the Marine Environment by Land-based Pollutants.                      | 1990 | National      | National      |
| 31  | Law on the Territorial Sea and the Contiguous Zone.                                                                            | 1992 | National      | National      |
| 32  | Implementation Regulations on Protection of Aquatic Wildlife.                                                                  | 1993 | National      | National      |
| 33  | The United Nations Convention on the Law of the Sea (UNCLOS).                                                                  | 1994 | International | International |
| 34  | Regulations of Natural Protected Reserves.                                                                                     | 1994 | National      | National      |

| No. | Law/Regulations                                                                                                                                                                                                                          | Year        | Level            | Scale           |
|-----|------------------------------------------------------------------------------------------------------------------------------------------------------------------------------------------------------------------------------------------|-------------|------------------|-----------------|
| 35  | Xiamen Marine Governance Office was established.                                                                                                                                                                                         | 1996        | Municipal        | Regional        |
| 36  | Marine function zoning of Xiamen City.                                                                                                                                                                                                   | 1996        | Municipal        | Regional        |
| 37  | Xiamen sea area environmental protection provisions.                                                                                                                                                                                     | 1997        | Municipal        | Regional        |
| 38  | Xiamen shallow sea shoal aquaculture governance provisions.                                                                                                                                                                              | 1997        | Municipal        | Regional        |
| 39  | Xiamen Chinese white dolphin protection provisions.                                                                                                                                                                                      | 1997        | Municipal        | Regional        |
| 40  | Law on Exclusive Economic Zones and Continental Shelves.                                                                                                                                                                                 | 1998        | National         | National        |
| 41  | Law on the Administration of the Use of Sea Areas.                                                                                                                                                                                       | 2001        | National         | National        |
| 42  | Xiamen Ocean and Fisheries Bureau was established.                                                                                                                                                                                       | 2002        | Municipal        | Regional        |
| 43  | Law on Evaluation of Environmental Affects.                                                                                                                                                                                              | 2002        | National         | National        |
| 44  | <b>Notice of Xiamen Municipal People's Government on the Comprehensive regulation of aquaculture prohibition in the West Sea Area. ("Coastal Exclusion Policy")</b>                                                                      | <b>2002</b> | <b>Municipal</b> | <b>Regional</b> |
| 45  | Port Law.                                                                                                                                                                                                                                | 2003        | National         | National        |
| 46  | Provisions of Xiamen City on the Administration of the use of sea areas                                                                                                                                                                  | 2003        | Municipal        | Regional        |
| 47  | Notice of Xiamen Municipal People's Government on Strengthening Aquaculture Governance in the East Sea area of Xiamen.                                                                                                                   | 2003        | Municipal        | Regional        |
| 48  | The General Office of Xiamen Municipal People's Government forwarded the notice of the Municipal Bureau of Marine Affairs and Fisheries on the second round of Xiamen Comprehensive Coastal Zone Governance (ICM) Strategic Action Plan. | 2005        | Municipal        | Regional        |
| 49  | Regulations Concerning Prevention and Control of Pollution Damage to the Marine Environment by Marine Construction Projects.                                                                                                             | 2006        | National         | National        |
| 50  | Notice of the General Office of Xiamen Municipal People's Government on carrying out the work of maritime boundary demarcation in the city.                                                                                              | 2008        | Municipal        | Regional        |
| 51  | Law on the Protection of Offshore Islands.                                                                                                                                                                                               | 2009        | National         | National        |
| 52  | Regulations on Prevention and Control of Marine Environment Pollution from Ships.                                                                                                                                                        | 2009        | National         | National        |
| 53  | Provisions of Xiamen City on Marine environmental protection.                                                                                                                                                                            | 2009        | Municipal        | Regional        |
| 54  | Measures for the Implementation of Xiamen Marine Aquaculture Exit Compensation.                                                                                                                                                          | 2009        | Municipal        | Regional        |
| 55  | Xiamen Marine and Fisheries Bureau is divided into Xiamen Marine Development Bureau, Xiamen Ecological Environment Bureau, and Xiamen Natural Resources and Planning Bureau.                                                             | 2018        | Municipal        | Regional        |
| 56  | Measures of Xiamen for the Administration of Marine ecological compensation.                                                                                                                                                             | 2018        | Municipal        | Regional        |
| 57  | Opinions of Xiamen Municipal People's Government on strengthening governance of sea-related tourism.                                                                                                                                     | 2018        | Municipal        | Regional        |
| 58  | The coastal landscape construction is in charge of Xiamen Municipal Garden and Forestry Bureau.                                                                                                                                          | 2021        | Municipal        | Regional        |
